# Supplementary material for: Systems approach to define humoral correlates of immunity to Shigella
Source: PubMed Central journal article supplement (PMC9396529; doi:10.1016/j.celrep.2022.111216), 2022-08-16
Supplement: mmc1.pdf [file mmc1.pdf]

Cell Reports, Volume 40

## Supplemental information

### Systems approach to define humoral correlates of immunity to *Shigella*

Biana Bernshtein, Esther Ndungo, Deniz Cizmeci, Peng Xu, Pavol Kováč, Meagan Kelly, Dilara Islam, Edward T. Ryan, Karen L. Kotloff, Marcela F. Pasetti, and Galit Alter

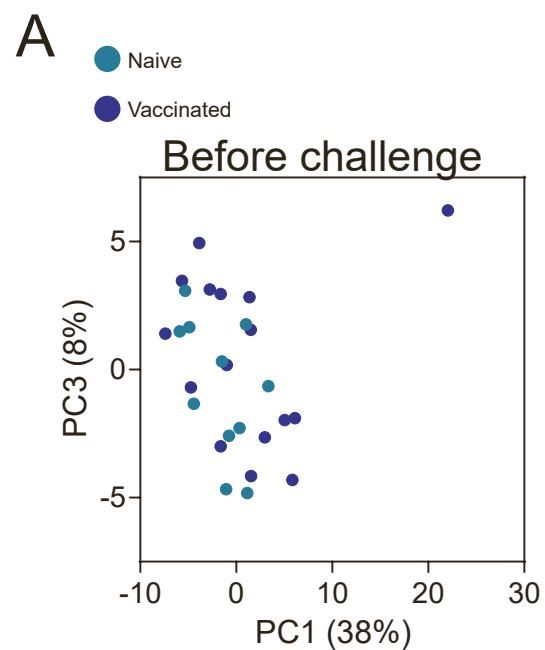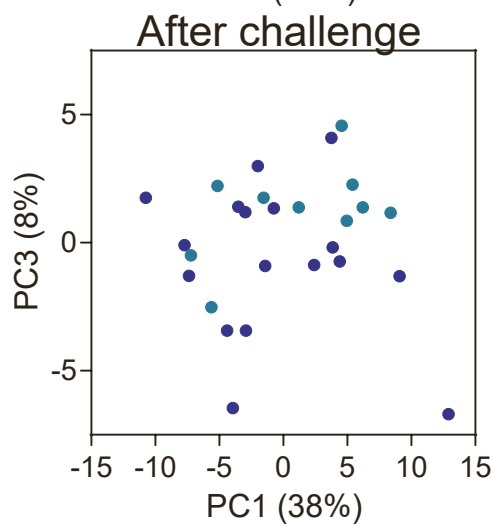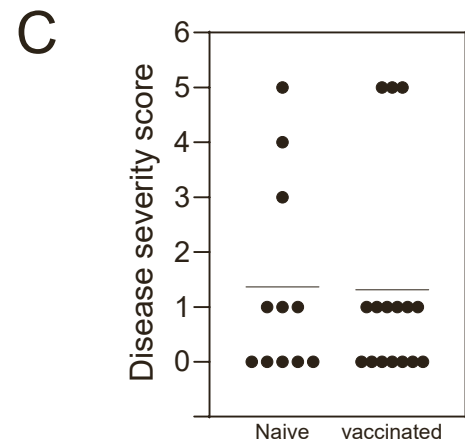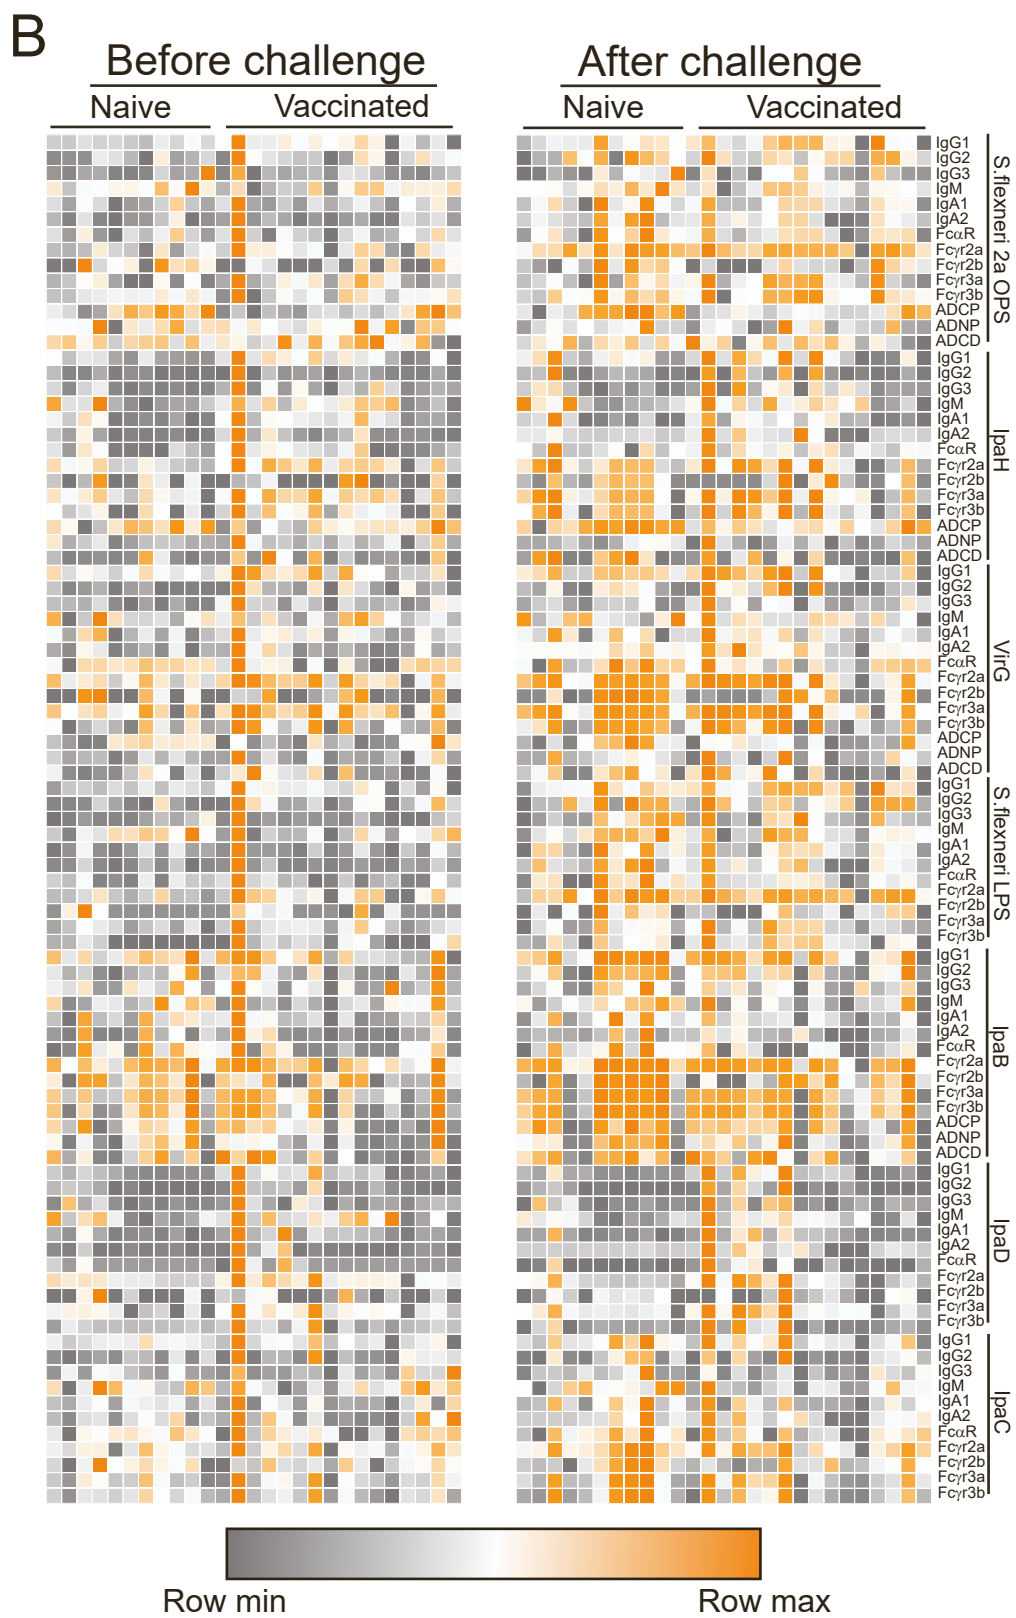

SuppFig1. Related to Fig1 (A) PCA of antibody profiles before and after *S. flexneri* 2a challenge of vaccinated and naïve study participants (B) Heat map depicting antibody isotype and FcR binding before and after challenge with *S. flexneri* 2a of vaccinated and naïve study participants (C) Disease severity score of vaccinated and naïve individuals

**A**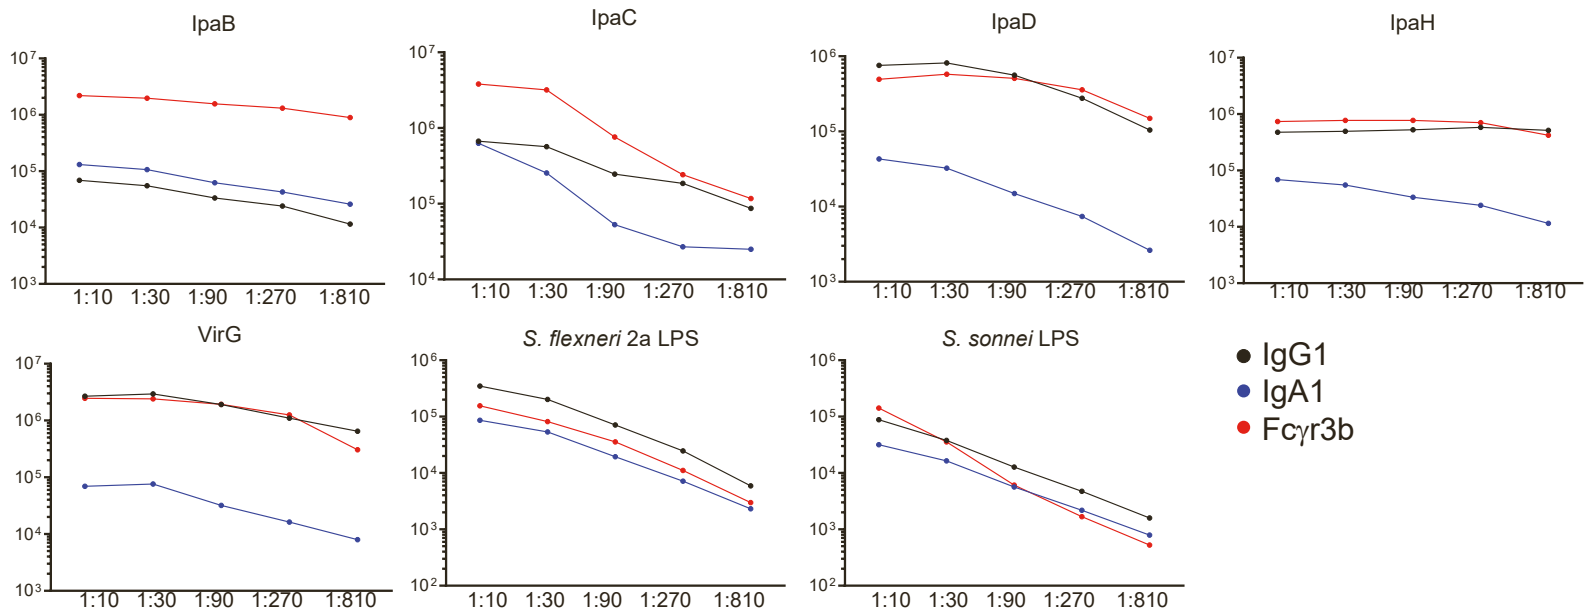**B**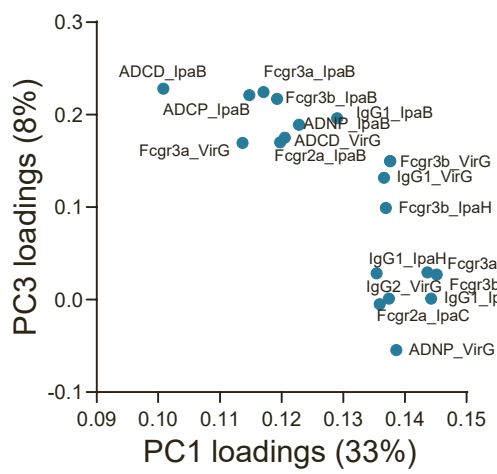

Supp Fig2. Related to Fig1. (A) Dilution curves of Shigella antigen-specific antibody binding by Luminex. (B) PC1 and PC3 loadings of PCA plot presented in Fig 1B



| 0-3 disease score | disease severity index | Temperature (F) | Loose stools | Stool volume | Dysenteric stools |
|-------------------|------------------------|-----------------|--------------|--------------|-------------------|
| 0                 | 0                      | 98.7            | 0            | 0            | 0                 |
| 0                 | 0                      | 98.7            | 0            | 0            | 0                 |
| 0                 | 0                      | 98.7            | 0            | 0            | 0                 |
| 0                 | 0                      | 98.7            | 0            | 0            | 0                 |
| 0                 | 0                      | 98.7            | 0            | 0            | 0                 |
| 1                 | 1                      | 101.7           | 3            | 459          | 0                 |
| 1                 | 2                      | 98.7            | 8            | 936          | 0                 |
| 1                 | 0                      | 98.7            | 3            | 140          | 1                 |
| 2                 | 4                      | 103             | 16           | 1982         | 5                 |
| 2                 | 2                      | 101.4           | 7            | 1030         | 6                 |
| 2                 | 4                      | 103.8           | 10           | 1058         | 8                 |
| 2                 | 1                      | 102.9           | 3            | 281          | 0                 |
| 2                 | 3                      | 102.4           | 16           | 2753         | 2                 |
| 2                 | 1                      | 101.5           | 9            | 1390         | 1                 |
| 2                 | 1                      | 98.7            | 4            | 366          | 3                 |
| 2                 | 2                      | 102             | 9            | 680          | 7                 |
| 3                 | 2                      | 104.2           | 15           | 3828         | 6                 |
| 3                 | 4                      | 103.9           | 14           | 2268         | 5                 |
| 3                 | 5                      | 103.5           | 26           | 4315         | 18                |
| 3                 | 2                      | 104.1           | 13           | 1269         | 8                 |
| 0                 | 0                      | 99.2            | 0            | 0            | 0                 |
| 0                 | 0                      | 99.1            | 0            | 0            | 0                 |
| 0                 | 0                      | 98.9            | 0            | 0            | 0                 |
| 0                 | 0                      | 98.3            | 0            | 0            | 0                 |
| 1                 | 1                      | 99.7            | 4            | 113          | 1                 |
| 1                 | 0                      | 99.2            | 1            | 13           | 0                 |
| 1                 | 0                      | 100.8           | 3            | 174          | 0                 |
| 1                 | 1                      | 101.5           | 1            | 114          | 0                 |
| 2                 | 1                      | 101.2           | 5            | 374          | 2                 |
| 2                 | 1                      | 103.2           | 2            | 180          | 1                 |
| 2                 | 1                      | 100.5           | 9            | 276          | 7                 |
| 2                 | 3                      | 102.8           | 8            | 1484         | 2                 |
| 3                 | 5                      | 103.2           | 34           | 2381         | 23                |
| 3                 | 5                      | 104.3           | 35           | 2249         | 32                |
| 3                 | 5                      | 102.9           | 32           | 1923         | 14                |
| 3                 | 5                      | 103             | 29           | 1574         | 21                |
| 2                 | 1                      | 102.3           | 5            | 574          | 1                 |
| 0                 | 0                      | 98.9            | 0            | 0            | 0                 |
| 1                 | 1                      | 101.3           | 0            | 0            | 0                 |
| 1                 | 0                      | 99.3            | 3            | 253          | 0                 |
| 2                 | 1                      | 102.4           | 7            | 368          | 4                 |
| 1                 | 0                      | 100.5           | 2            | 22           | 2                 |
| 2                 | 1                      | 103.9           | 11           | 2065         | 2                 |
| 2                 | 4                      | 102.5           | 14           | 974          | 7                 |
| 0                 | 0                      | 98.7            | 0            | 0            | 0                 |
| 1                 | 0                      | 98.7            | 3            | 217          | 2                 |
| 0                 | 0                      | 98.2            | 0            | 0            | 0                 |
| 0                 | 0                      | 98.7            | 0            | 0            | 0                 |
| 0                 | 0                      | 98.7            | 0            | 0            | 0                 |
| 0                 | 0                      | 98.7            | 0            | 0            | 0                 |
| 0                 | 0                      | 98.7            | 0            | 0            | 0                 |
| 0                 | 0                      | 98.7            | 0            | 0            | 0                 |
| 1                 | 0                      | 98.7            | 3            | 100          | 0                 |
| 1                 | 0                      | 100.5           | 2            | 183          | 0                 |

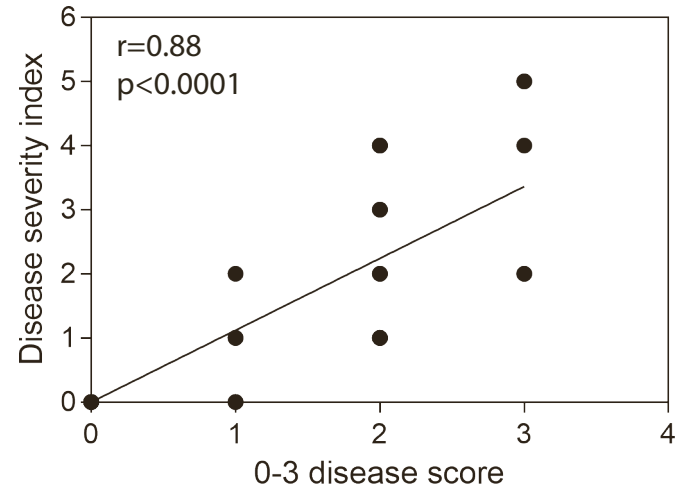

SuppFig4. Related to Figures 2,3,4,5 and 7. Table of measured shigellosis symptoms and disease severity scores and spearman correlation between 0-3 disease scores and disease severity index used in this manuscript.

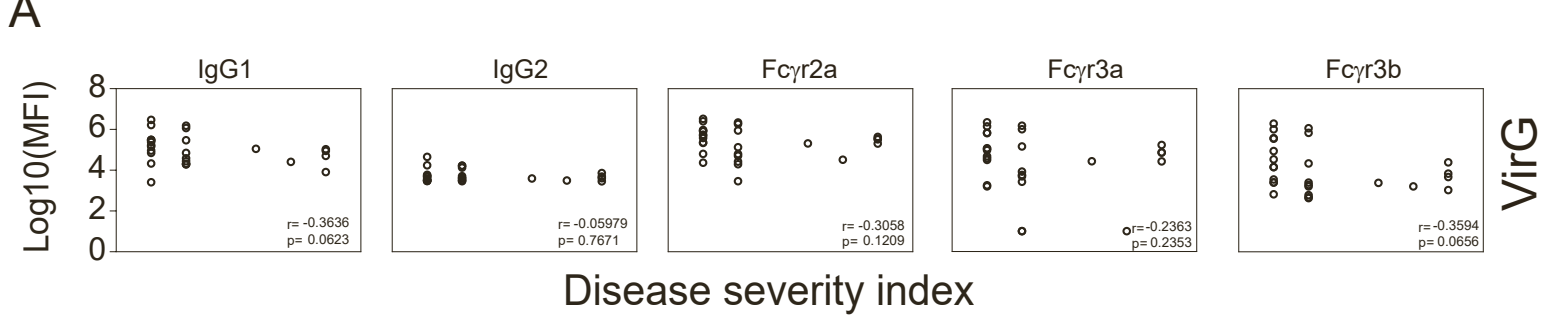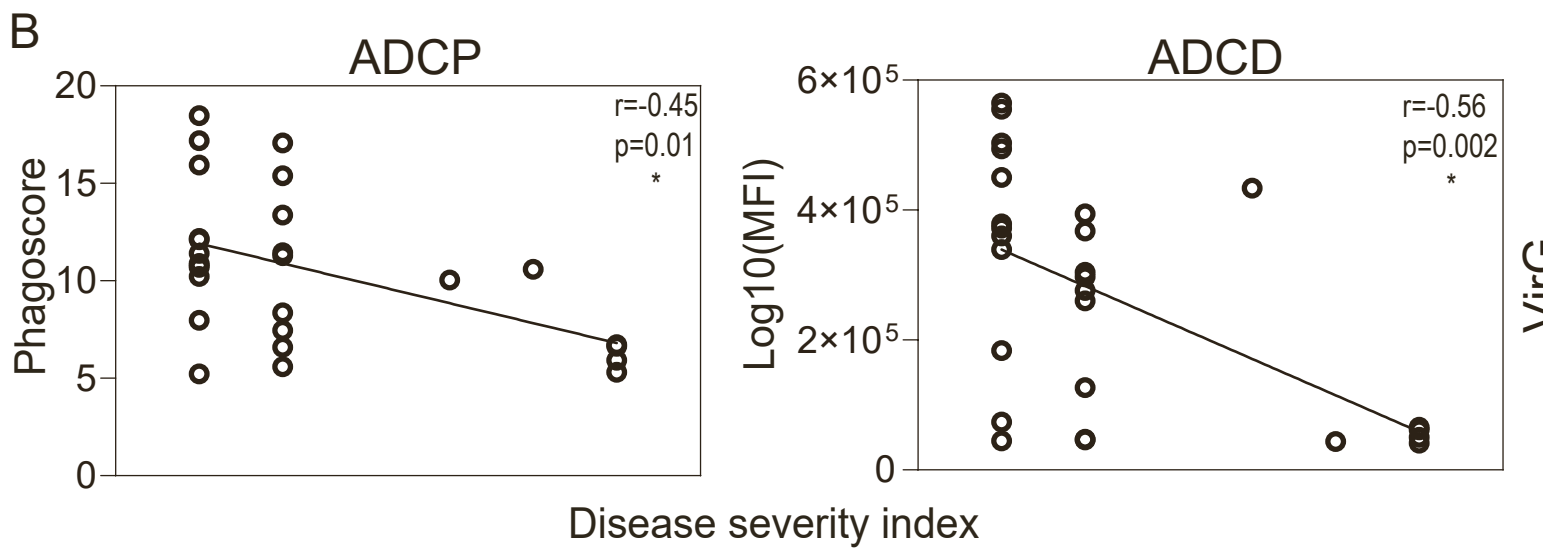

SuppFig5. Related to Figures 2 and 3. Spearman correlation of disease severity index and VirG-specific antibody-mediated functions before *S. flexneri* 2a challenge.

**A**

Before challenge

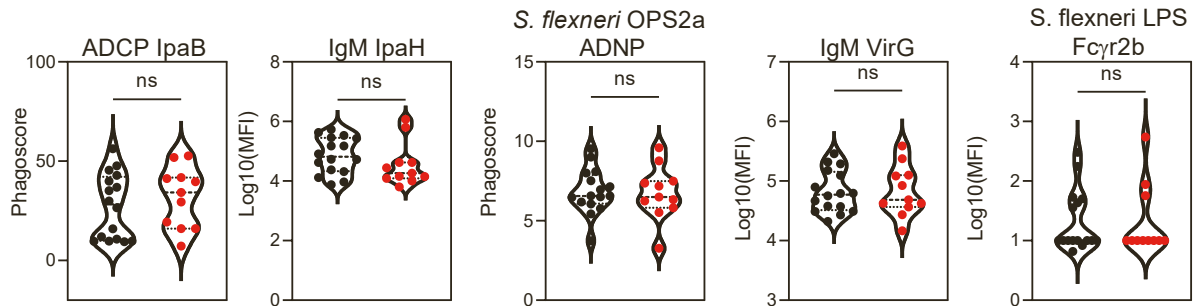

After challenge

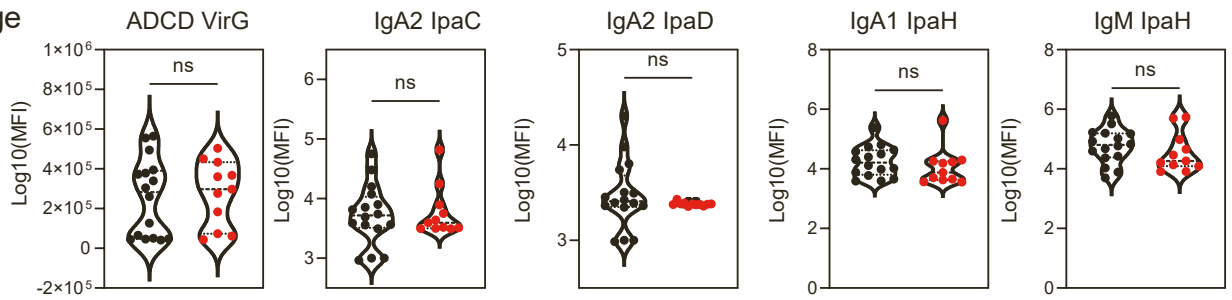Vaccinated  
Naive**B**

Before challenge

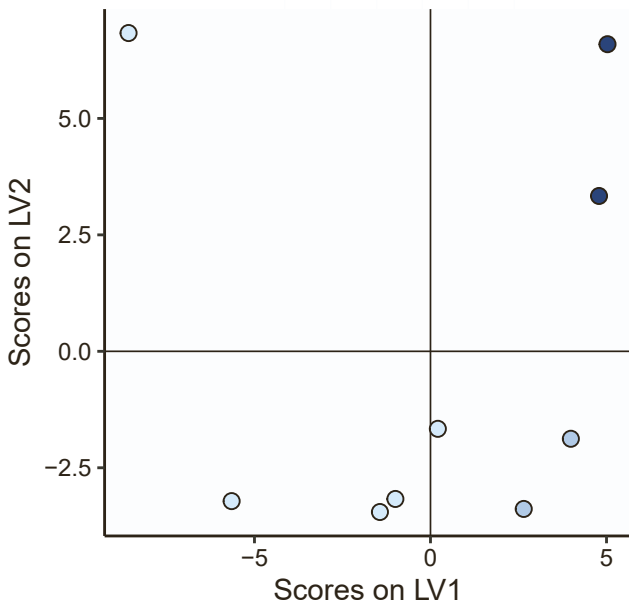**C**

After challenge

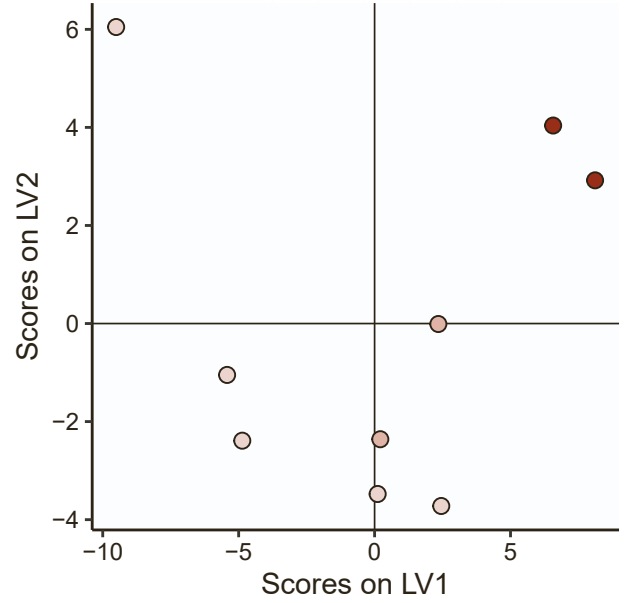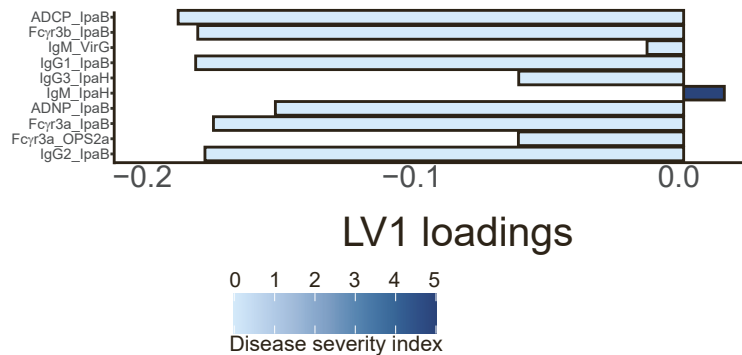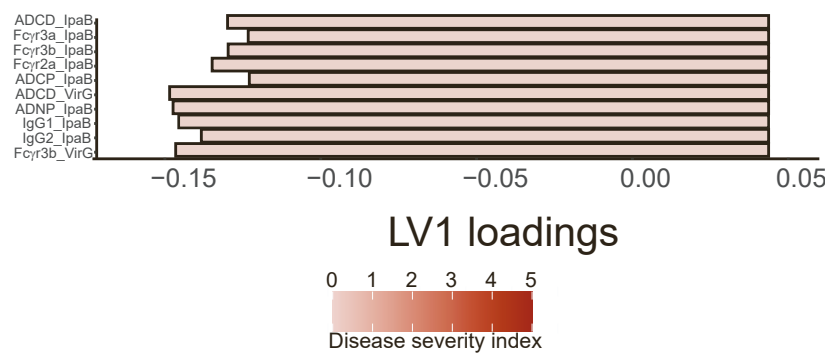

SuppFig6. Related to Figure 4. (A) LASSO selected antibody features from PLSR in Fig4 before and after *S.flexneri* 2a challenge of vaccinated and naïve study participants. (B-C) PLSR and top 10 VIP antibody features before (B) and after (C) challenge in naïve individuals from CHIM1 (n=11).

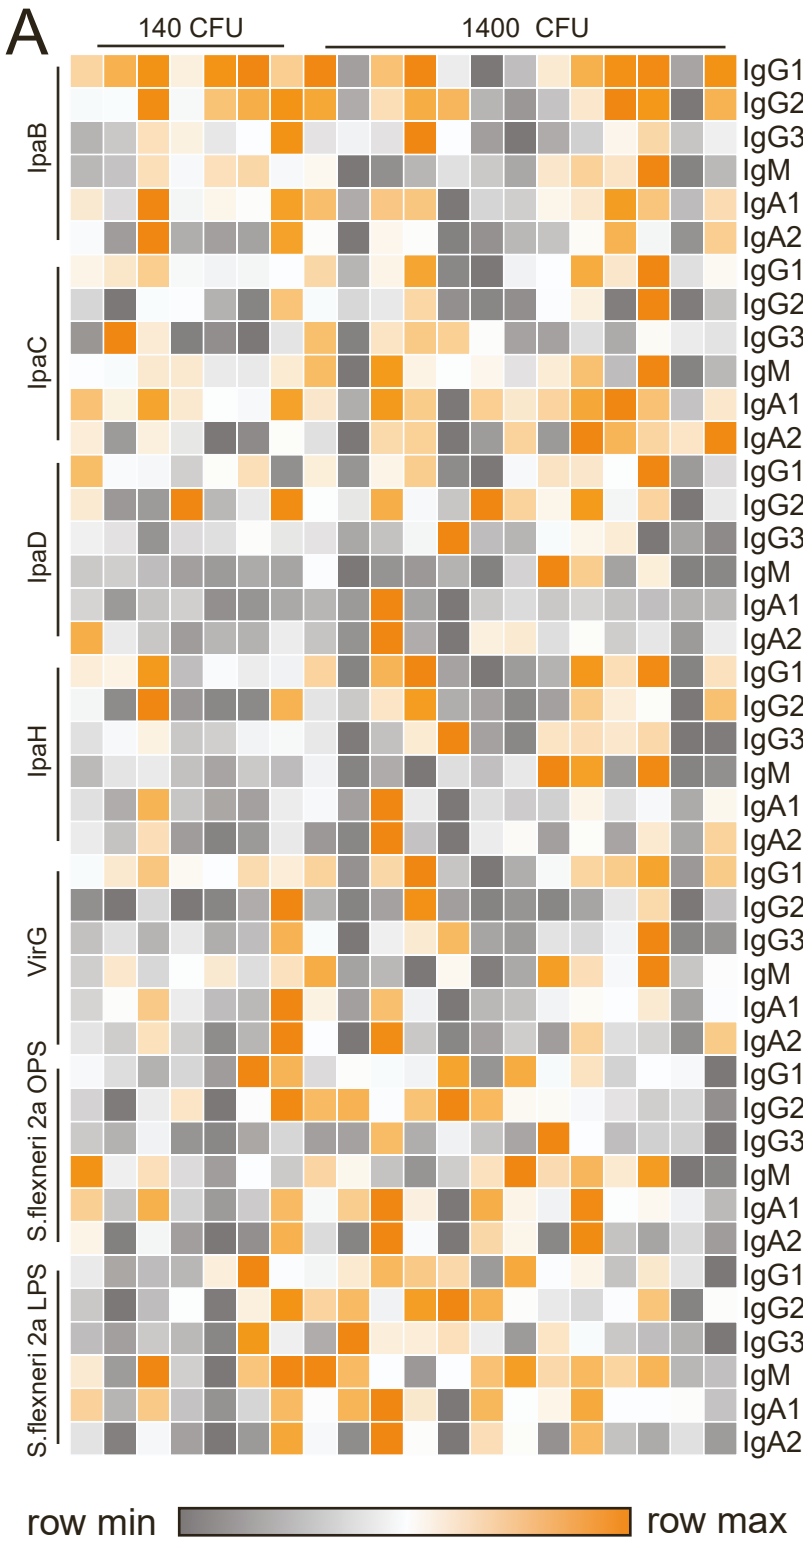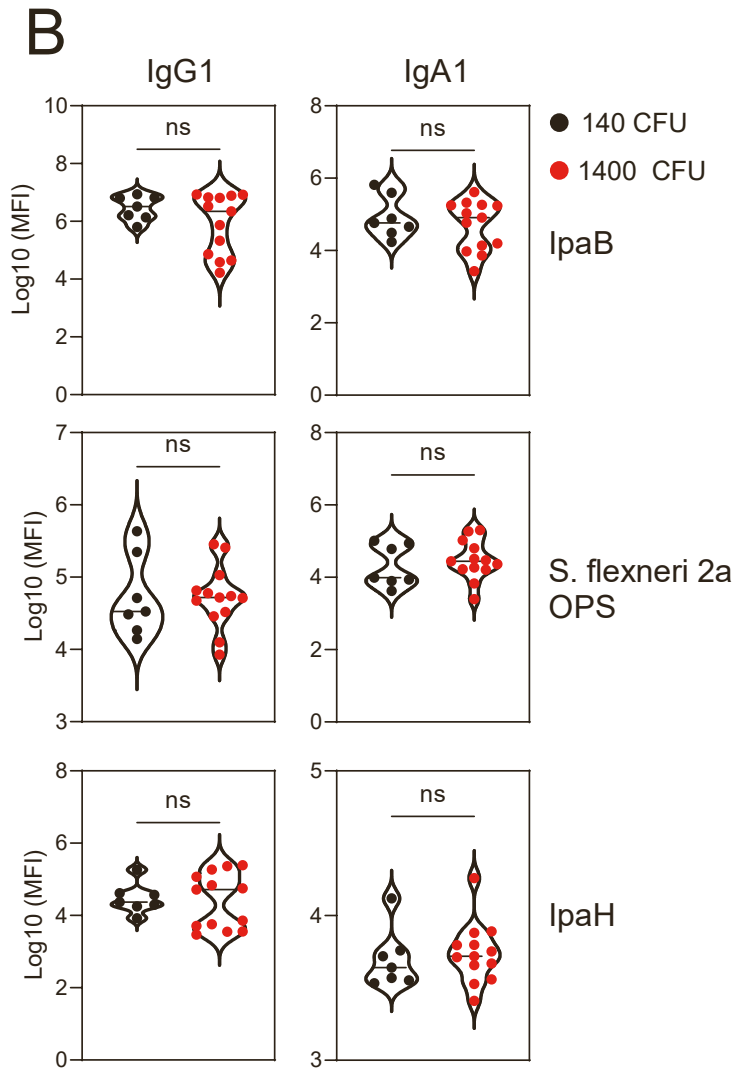

SuppFig7. Related to Figure 6. (A) Heat map depicting antibody isotype after challenge with *S. flexneri* 2a in high dose (1400 CFU) and low dose (140 CFU) recipients. (B) IgG1 and IgA1 levels of IpaB, *S. flexneri* 2a OPS and IpaH specific antibodies after *S. flexneri* 2a challenge in high dose (1400 CFU) and low dose (140 CFU) recipients measured by Luminex (wilcoxon test).



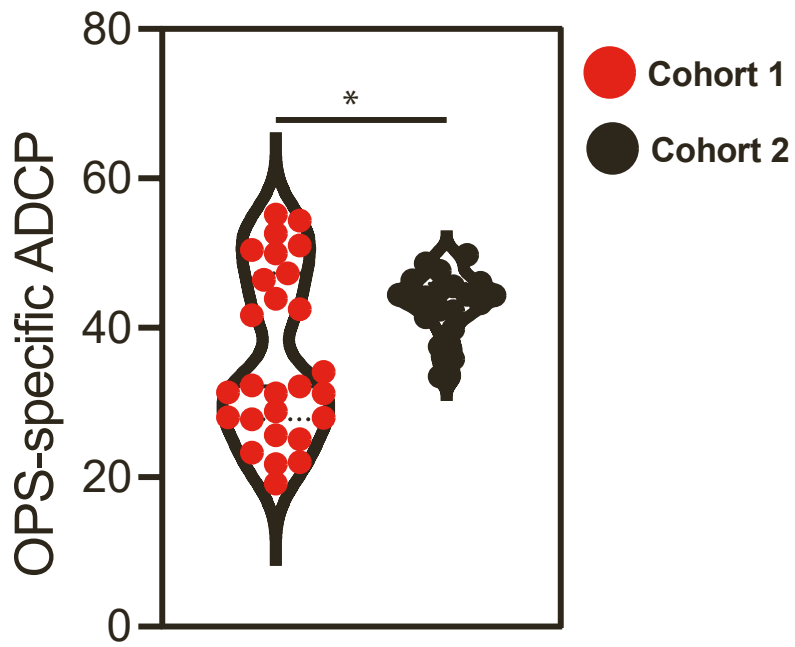

SuppFig8. Related to Figure 6. OPS-specific antibody-mediated phagocytosis before *S. flexneri* 2a challenge in first cohort and validation cohort (\* $P < 0.05$ , wilcoxon test).
